# Supplementary material for: Landslide susceptibility estimation by random forests technique: sensitivity and scaling issues
Source: Copernicus journal article supplement (doi:10.5194/nhess-13-2815-2013), 2013-11-13

AUXILIARY MATERIAL FOR THE PAPER:

**Landslide susceptibility estimation by random forests technique: sensitivity and scaling issues**

Catani, F., Lagomarsino, D., Segoni, S., Tofani, V.

Department of Earth Sciences, University of Florence, Firenze, Italy

Rank-MUR-LCV# plots illustrating the variation of parameter importance (expressed as rank using the color ramp on the right) with parameter space (n. of parameters LCV#) and map unit resolution (MUR in m). Grey colors correspond to combinations of MUR and LCV# in which the parameter was discarded. The white boxes indicate the combination of MUR-LCV# leading to the best classification for each resolution (Table 2 in the main text).

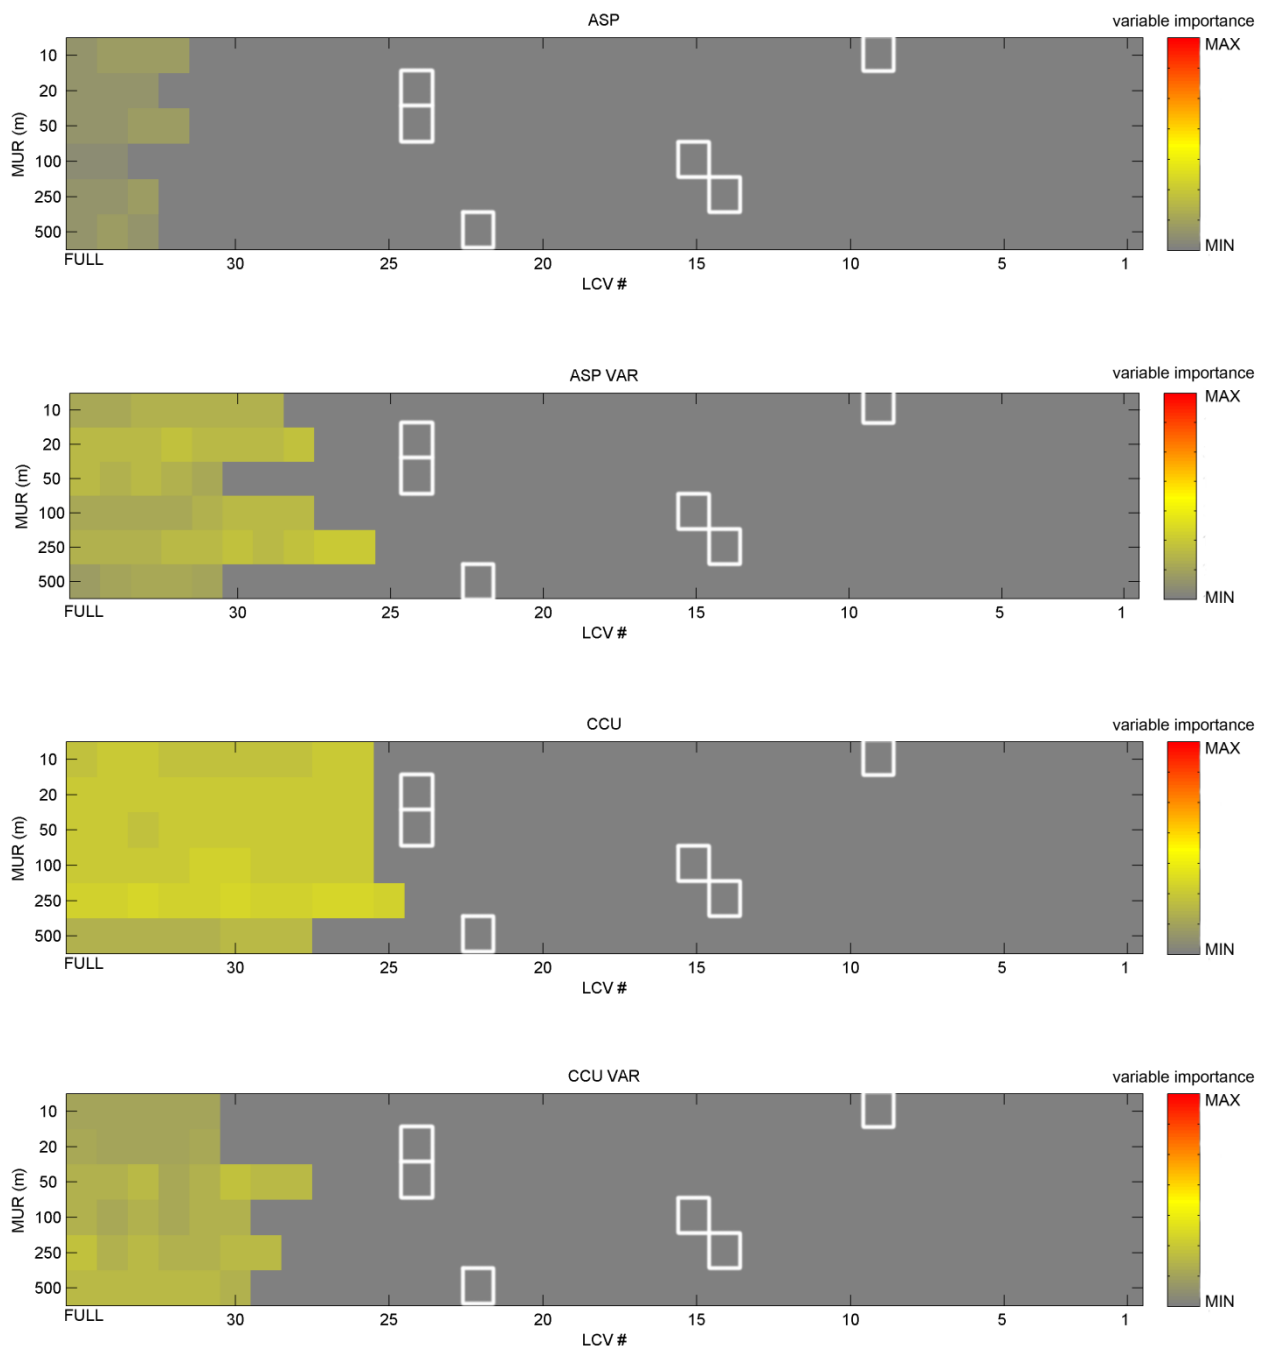

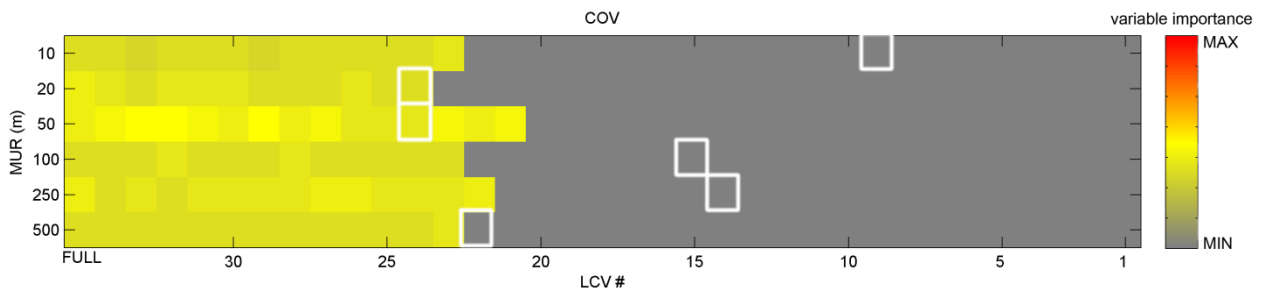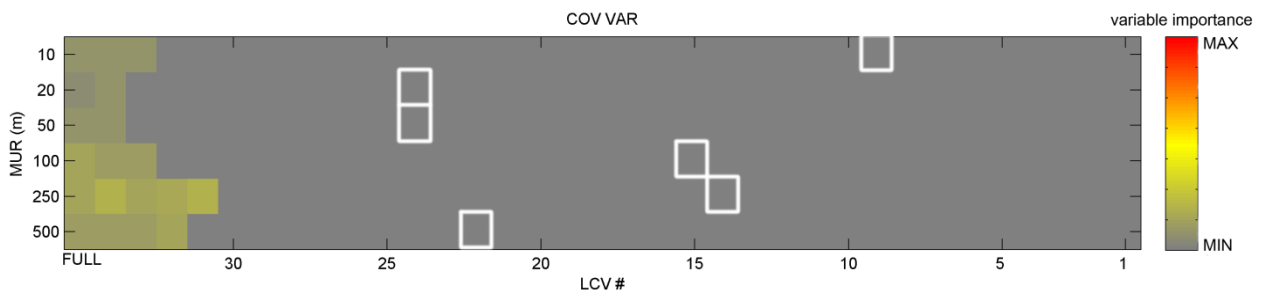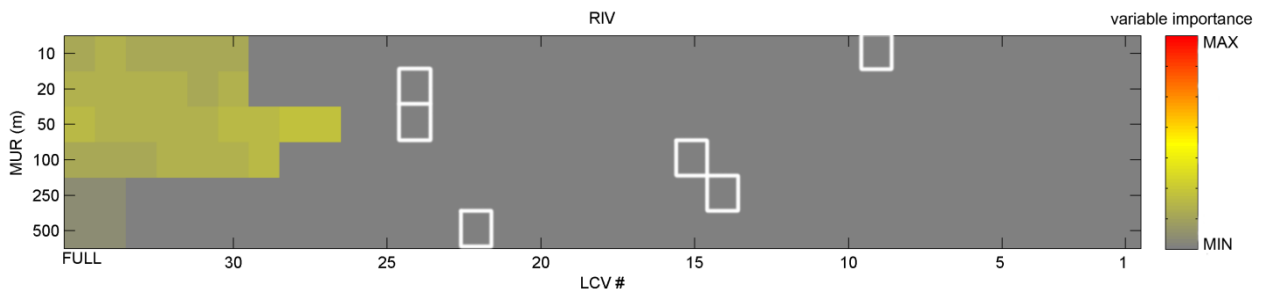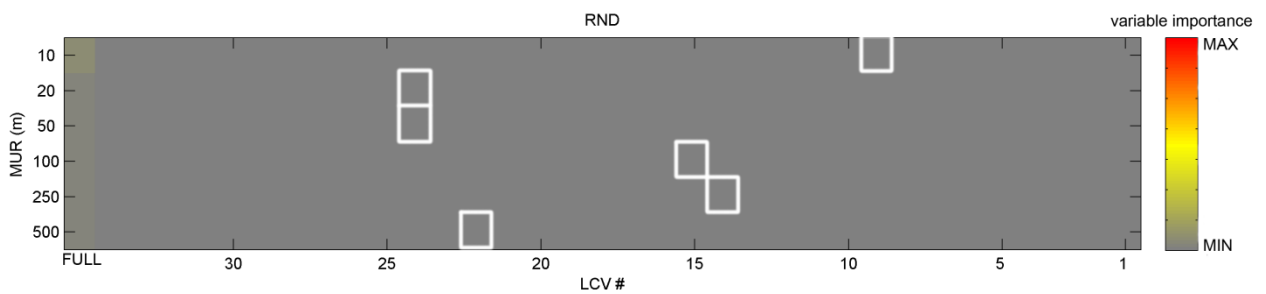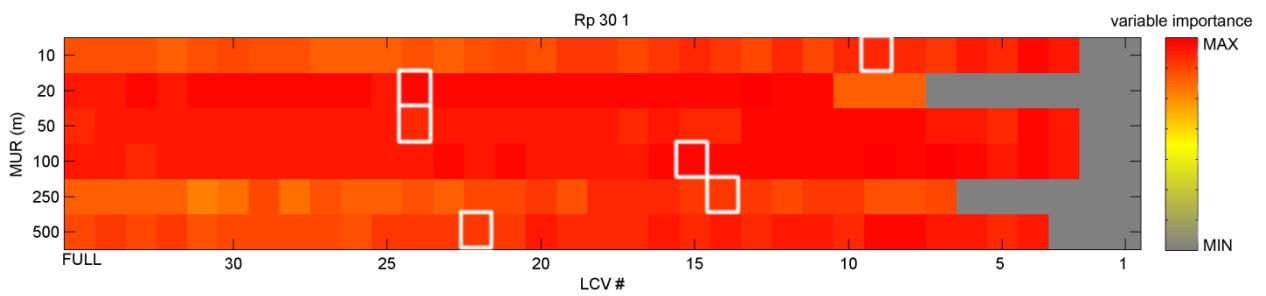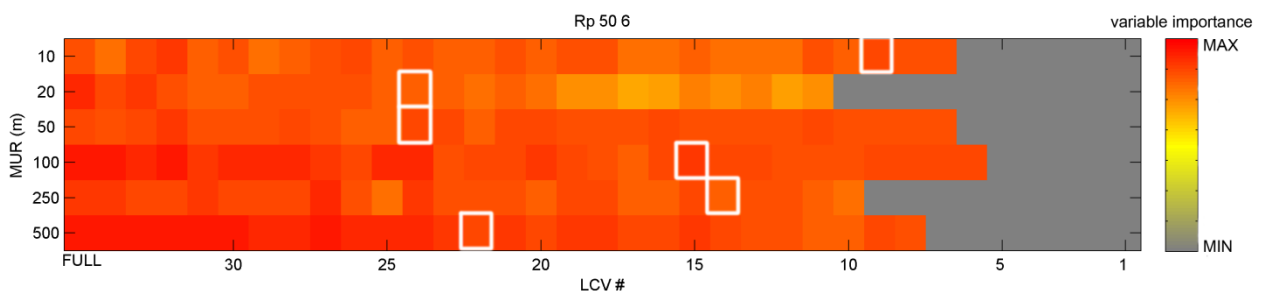

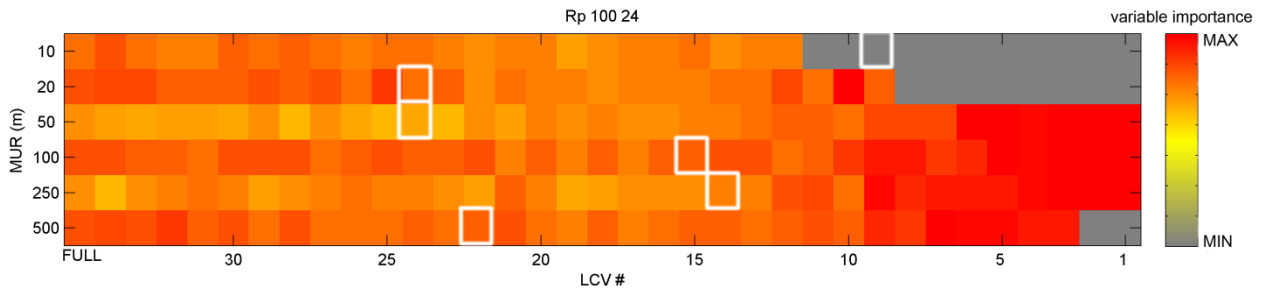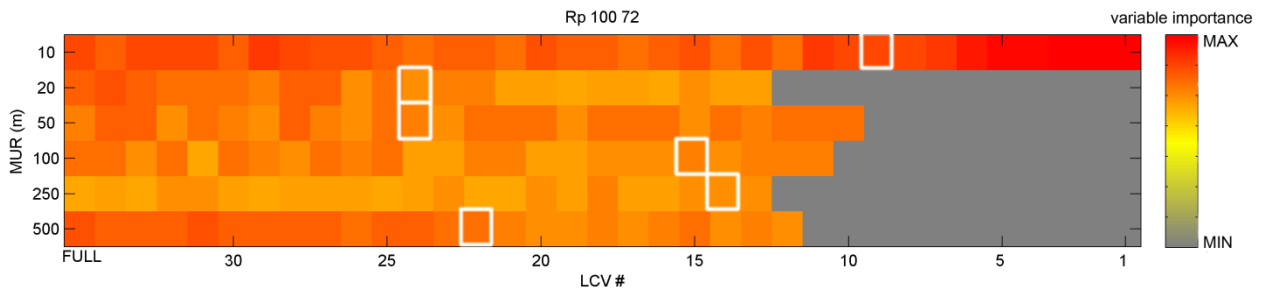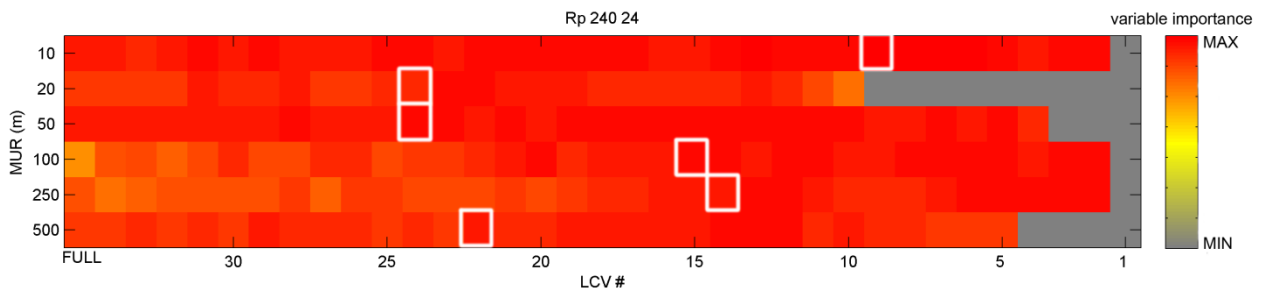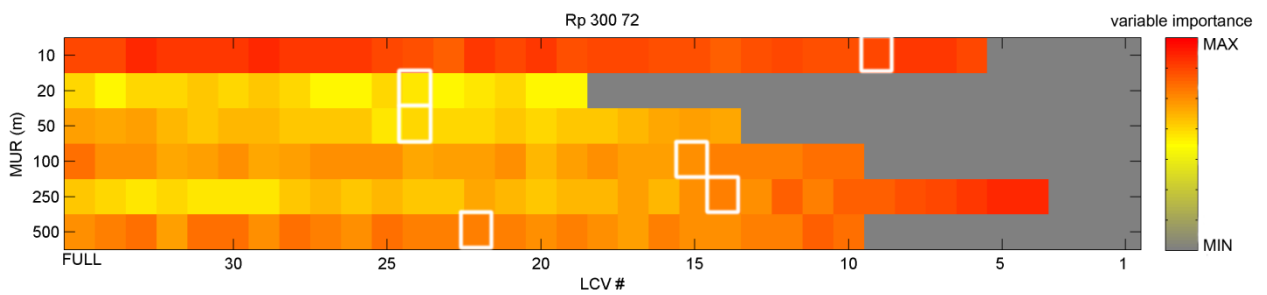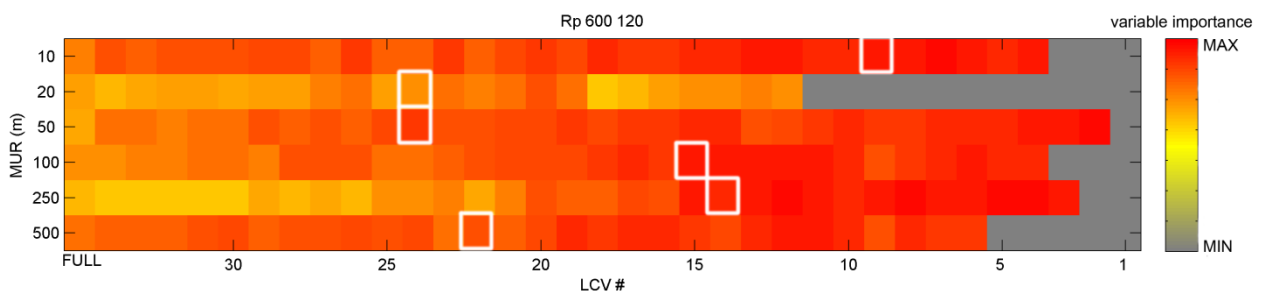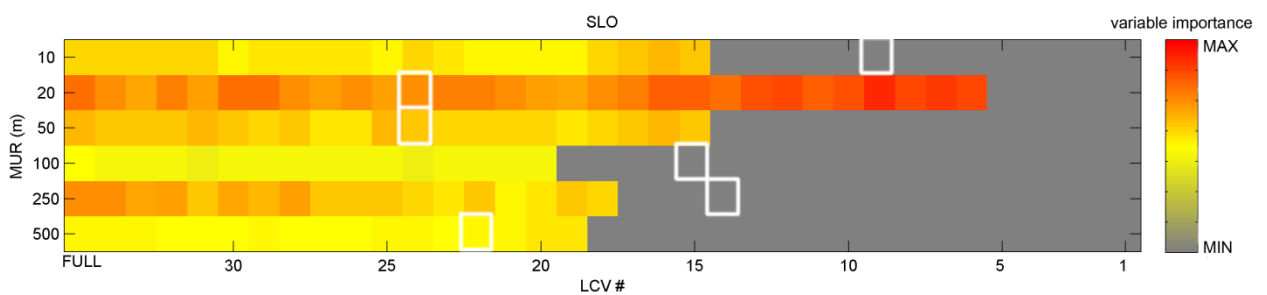

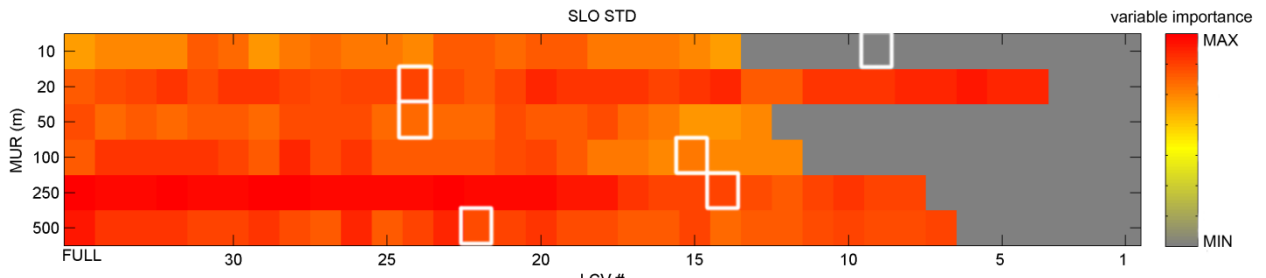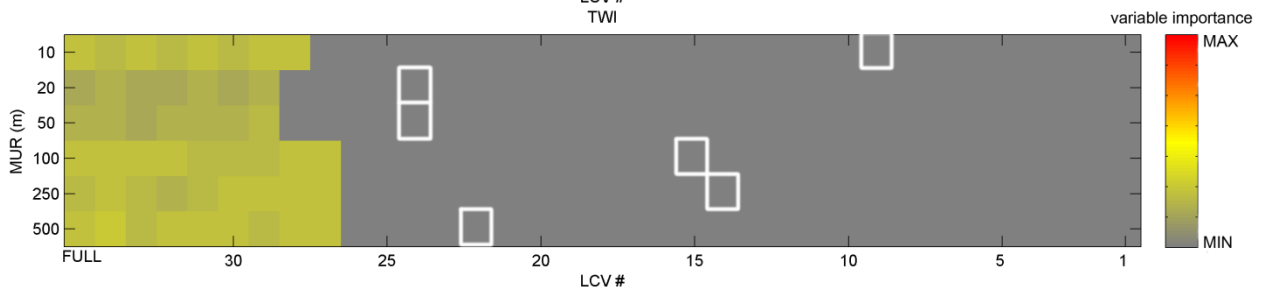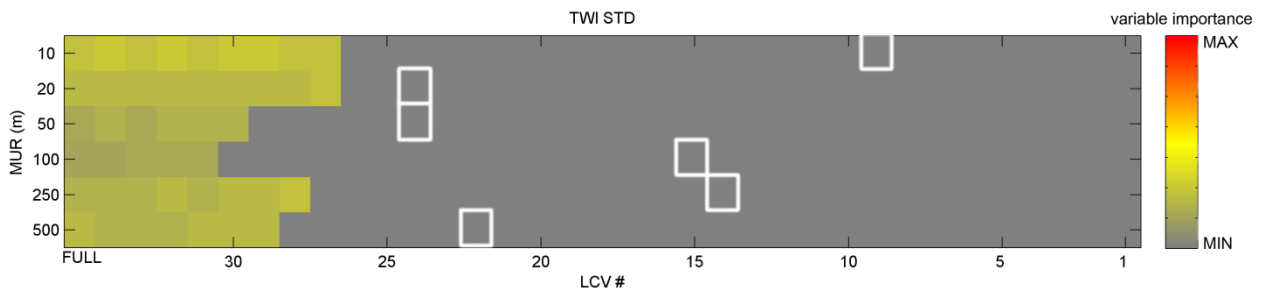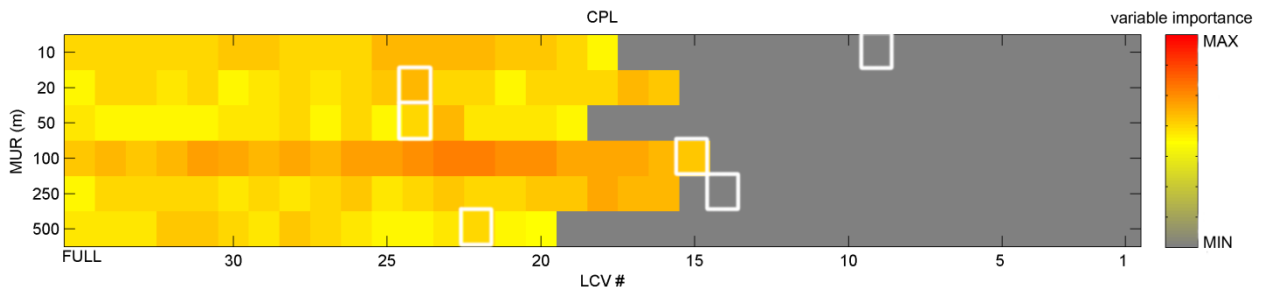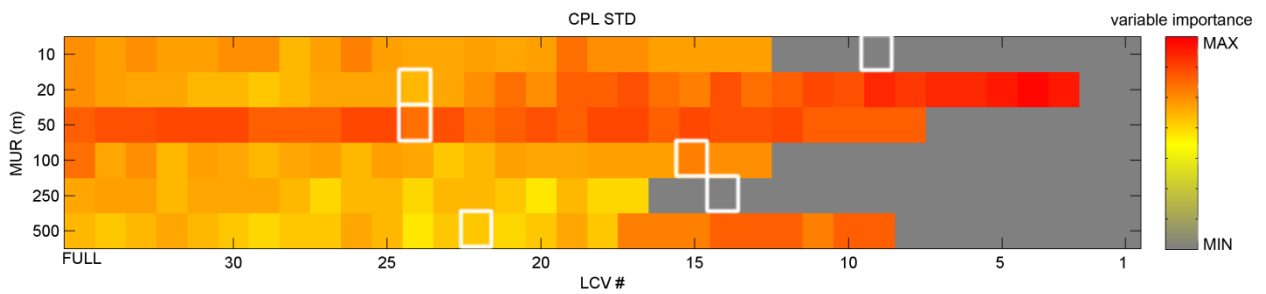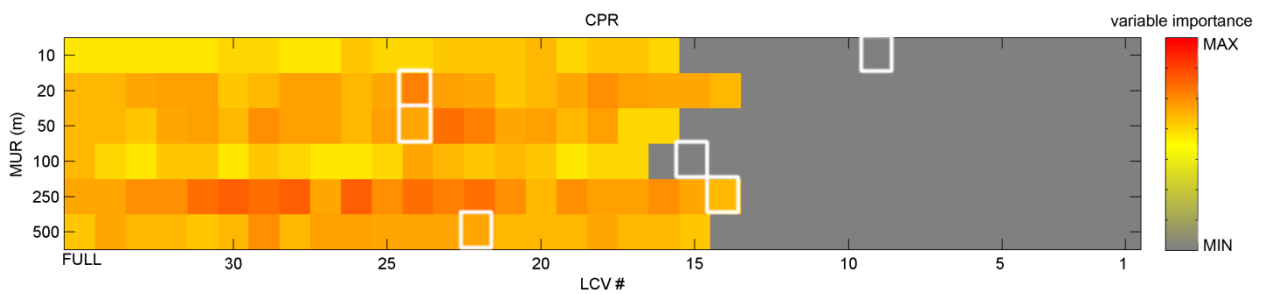

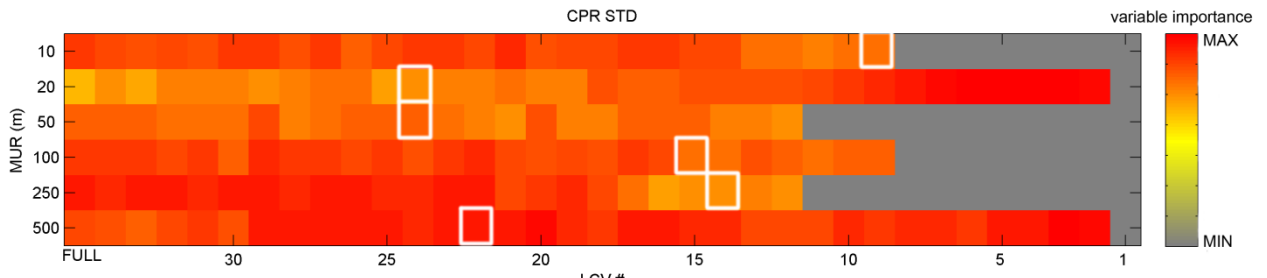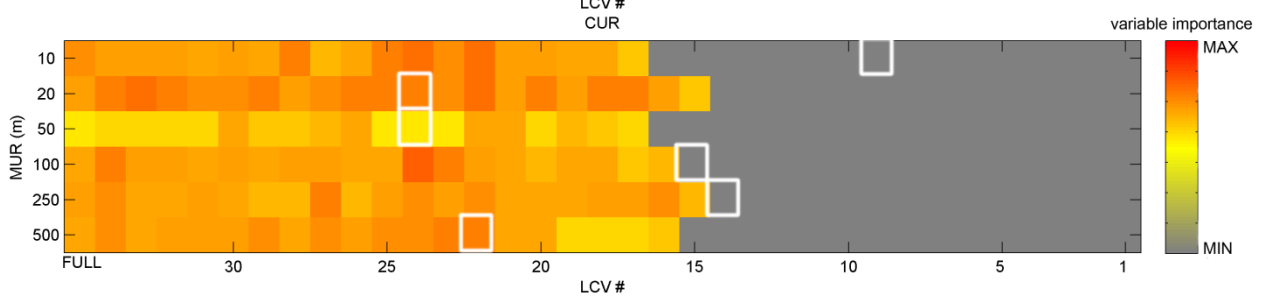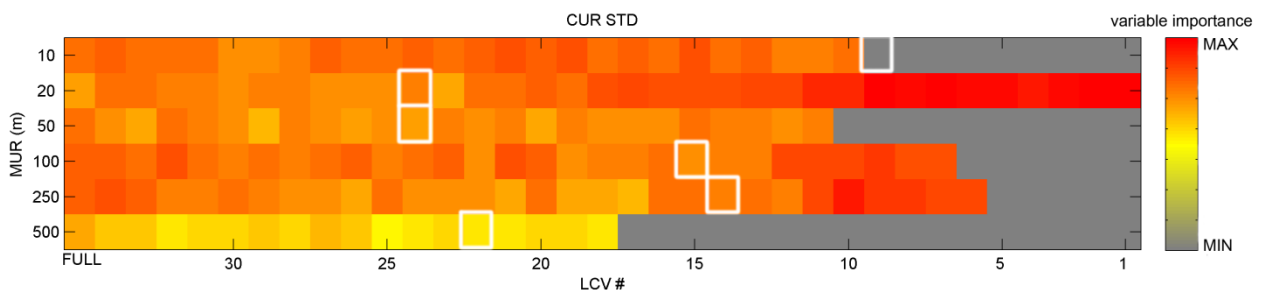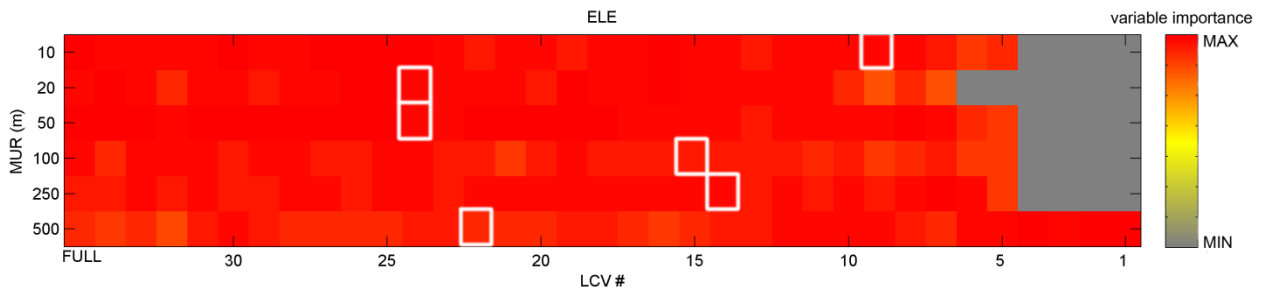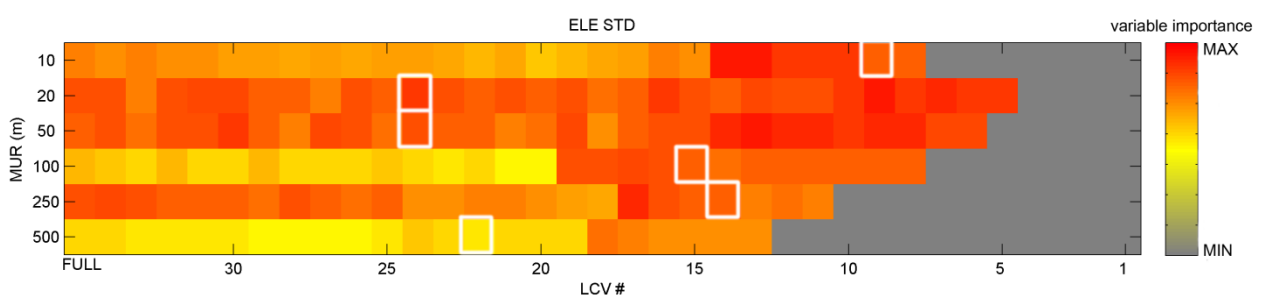

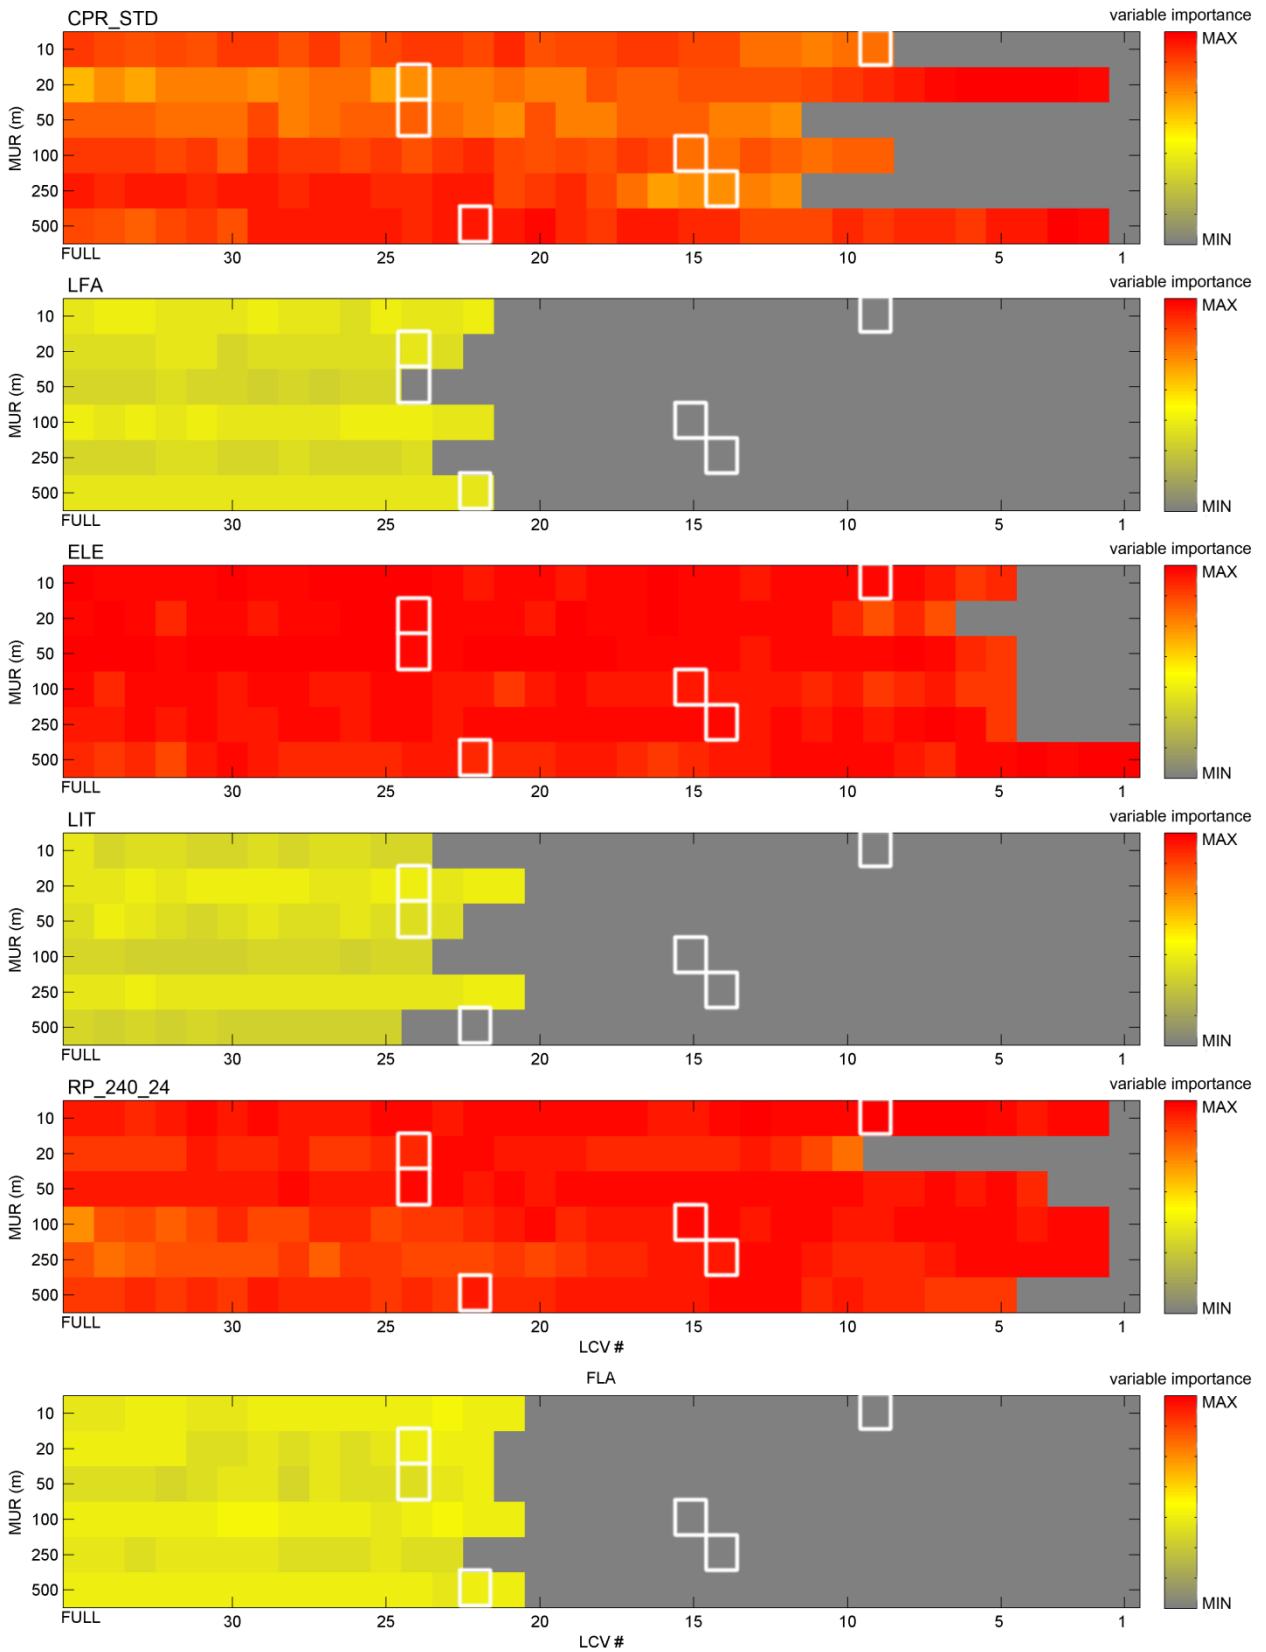

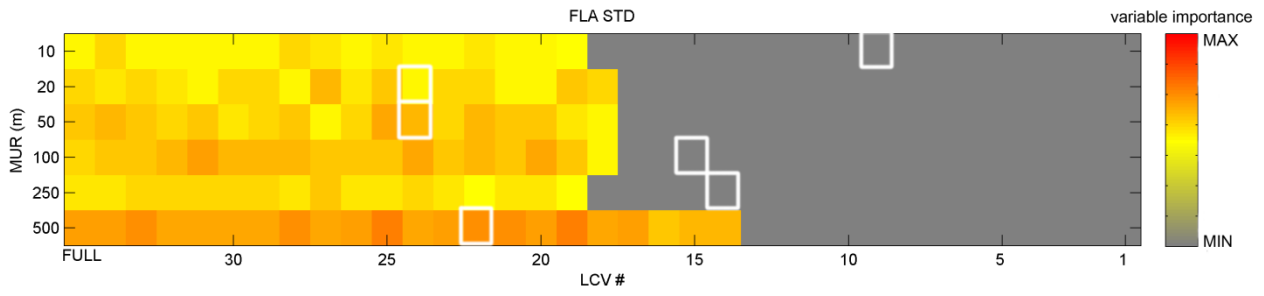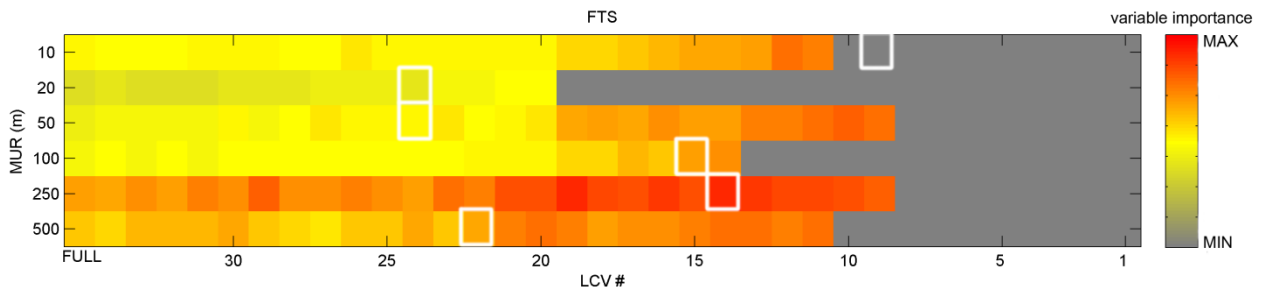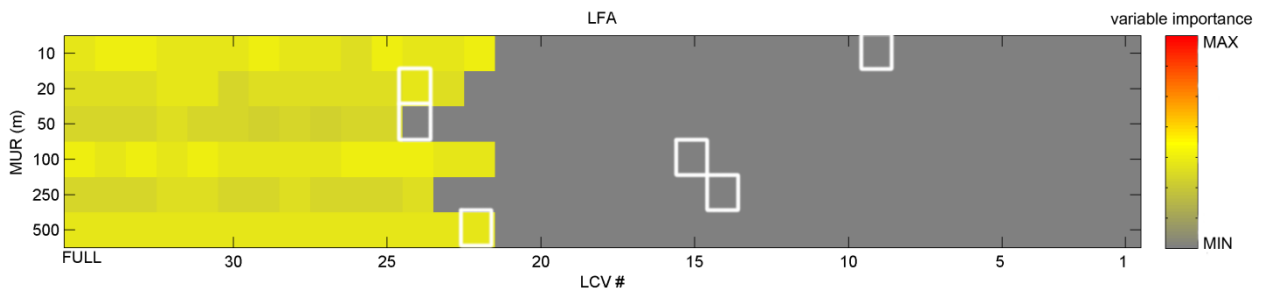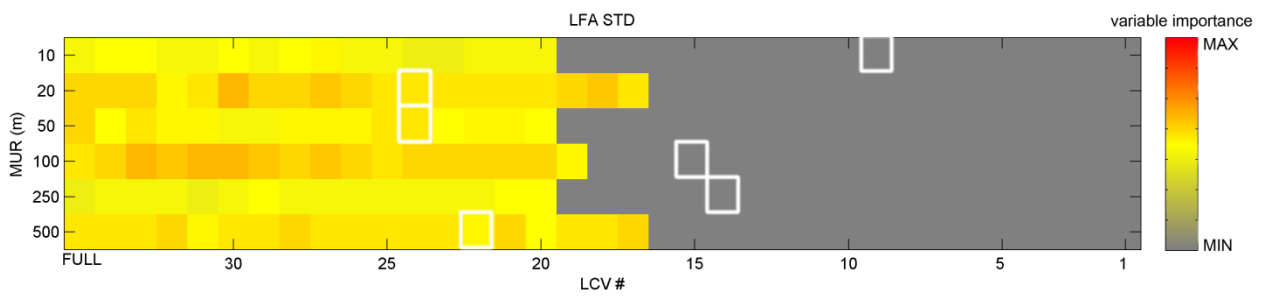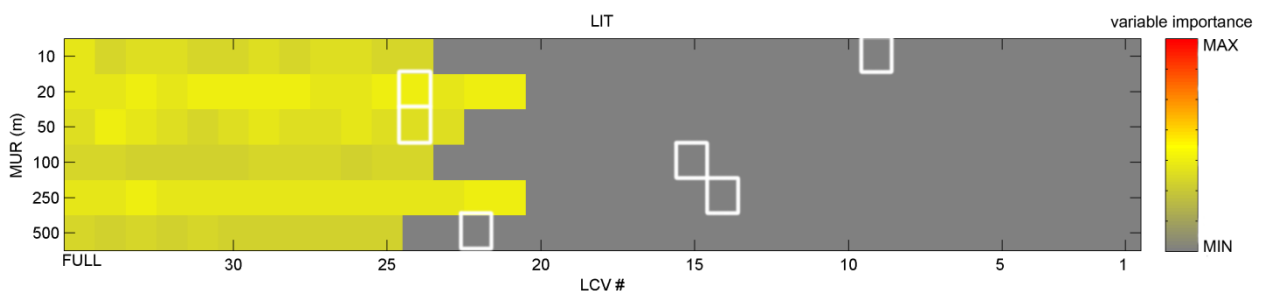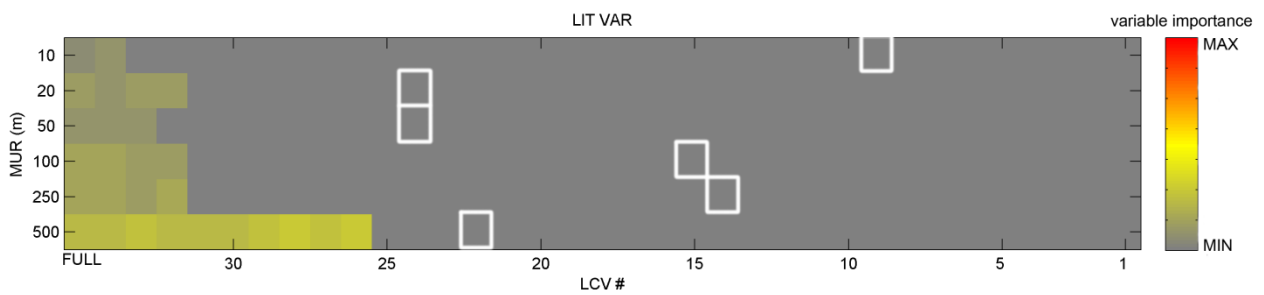

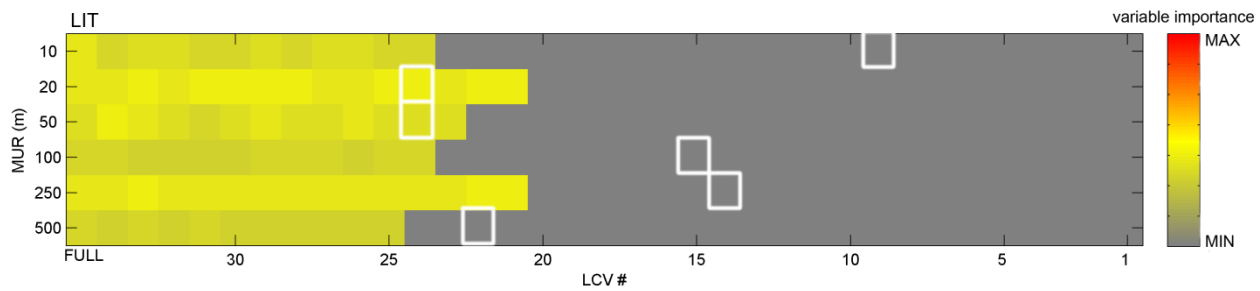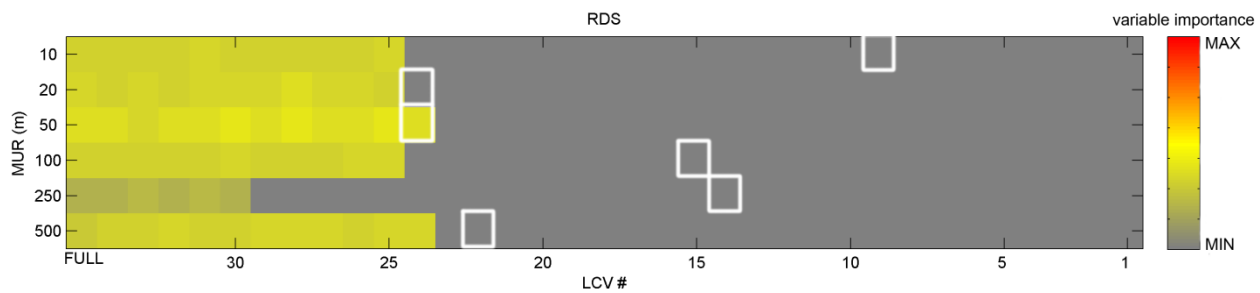



Mental map depicting the main lines of LSM model sensitivity for Random Forest methods. Green light: topics discussed in the paper; Yellow light: topics partially discussed; Red light: topics not included in the experimentation.

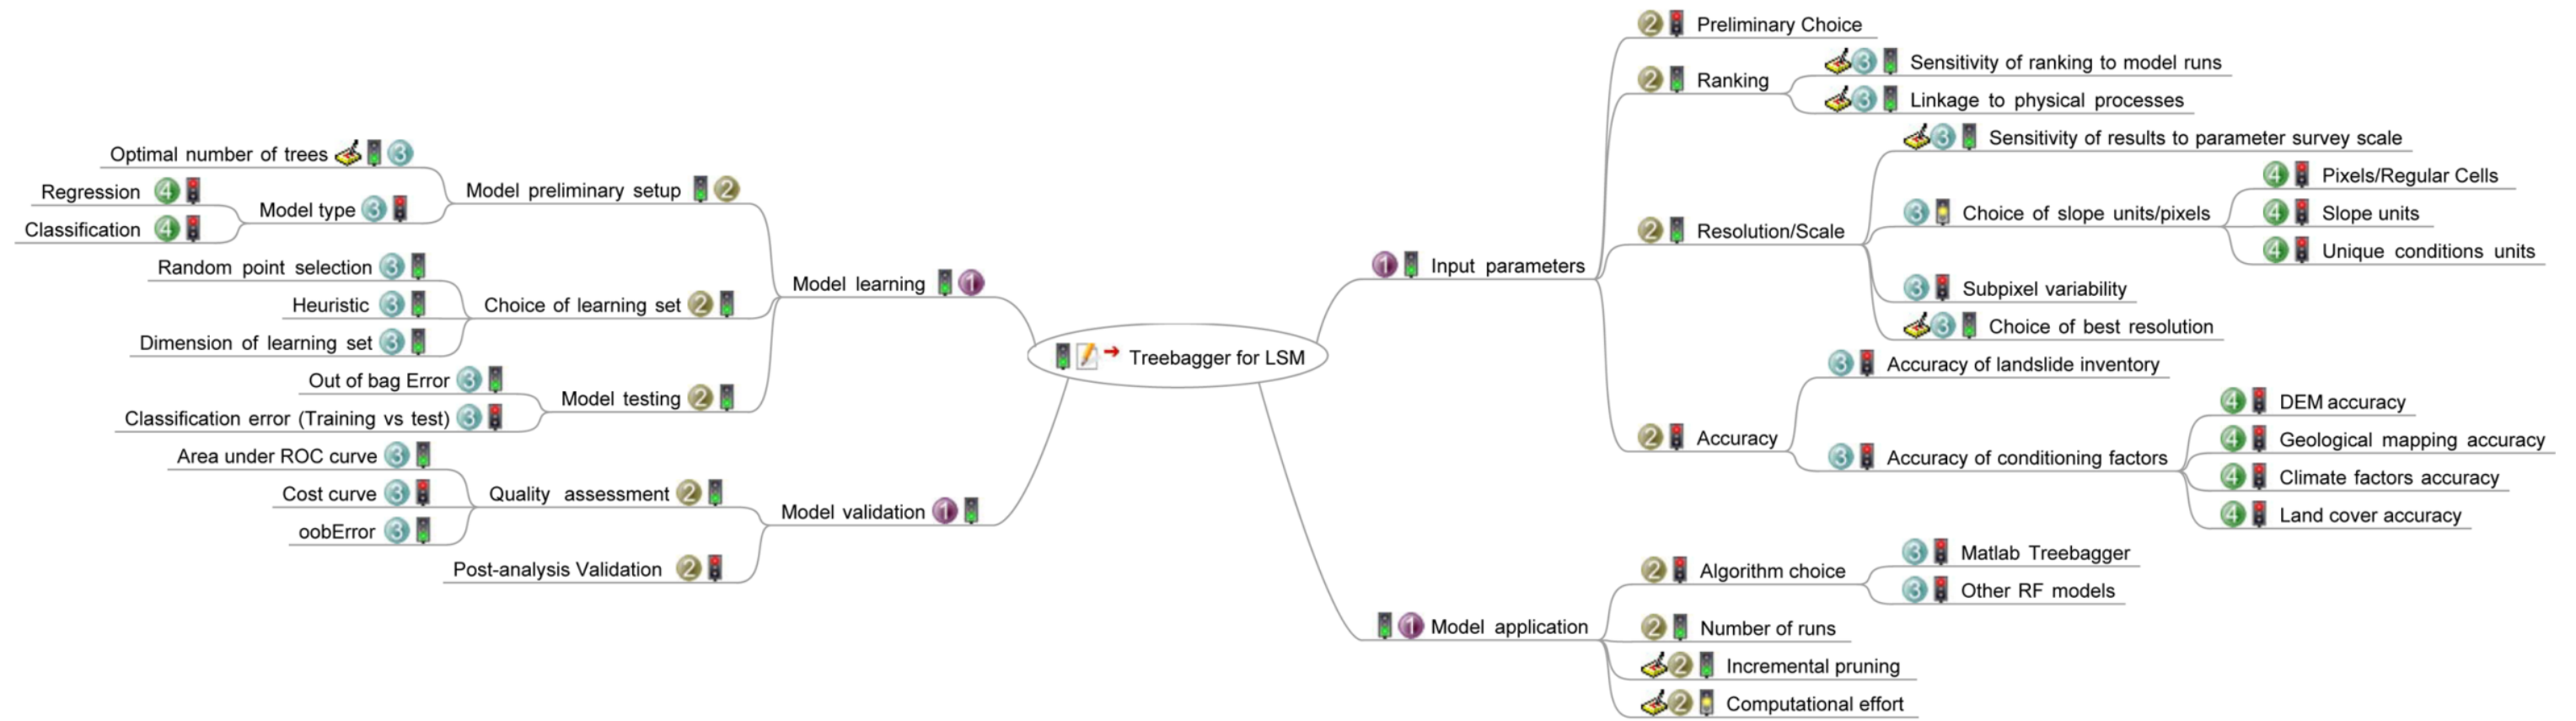

Supplement: Supplementary file [file nhess-13-2815-2013-supplement.pdf]
